# Supplementary material for: Thickness of zero-strength layer in timber beam exposed to fuel-controlled parametric fires
Source: Springer Nature journal article supplement (doi:10.1007/s00226-023-01480-8), 2023-07-01
Supplement: MOESM1 [file 25856356]

Input parameters of 46 fire scenarios ( $O$ ,  $b$ ,  $q_{fd}$ ), output parameters of the mechanical analysis ( $M_{Rd,fi}$ ,  $t_{end}$ ) and parameters of the effective cross-section ( $d_{ch}$ ,  $d_0$ )

| #  | $O$<br>[m <sup>1/2</sup> ] | $b$<br>[J m <sup>-2</sup> s <sup>-1/2</sup> K <sup>-1</sup> ] | $q_{fd}$<br>[MJ m <sup>-2</sup> ] | $M_{Rd,fi}$<br>[kN m] | $t_{end}$<br>[min] | $d_{ch}$<br>[mm] | $d_0$<br>[mm] |
|----|----------------------------|---------------------------------------------------------------|-----------------------------------|-----------------------|--------------------|------------------|---------------|
| 1  | 0.12                       | 500                                                           | 300                               | 28.9                  | 23.8               | 28.7             | 10.1          |
| 2  | 0.20                       | 500                                                           | 300                               | 30.6                  | 23.1               | 27.8             | 8.8           |
| 3  | 0.20                       | 500                                                           | 600                               | 19.7                  | 22.7               | 44.1             | 7.9           |
| 4  | 0.12                       | 500                                                           | 300                               | 27.7                  | 35.4               | 29.7             | 10.7          |
| 5  | 0.20                       | 500                                                           | 300                               | 28.5                  | 40.0               | 29.1             | 10.2          |
| 6  | 0.20                       | 500                                                           | 600                               | 17.6                  | 29.3               | 47.0             | 8.6           |
| 7  | 0.20                       | 500                                                           | 900                               | 11.2                  | 32.6               | 59.4             | 8.3           |
| 8  | 0.12                       | 500                                                           | 300                               | 26.1                  | 37.9               | 30.8             | 11.8          |
| 9  | 0.12                       | 500                                                           | 600                               | 14.8                  | 41.2               | 50.7             | 9.9           |
| 10 | 0.20                       | 500                                                           | 300                               | 27.1                  | 33.6               | 30.1             | 11.1          |
| 11 | 0.20                       | 500                                                           | 600                               | 16.1                  | 40.8               | 49.4             | 8.9           |
| 12 | 0.20                       | 500                                                           | 900                               | 9.7                   | 34.7               | 63.0             | 8.0           |
| 13 | 0.20                       | 500                                                           | 1200                              | 5.7                   | 35.2               | 72.3             | 8.5           |
| 14 | 0.12                       | 1000                                                          | 300                               | 34.1                  | 28.8               | 18.0             | 14.3          |
| 15 | 0.20                       | 1000                                                          | 300                               | 37.0                  | 29.1               | 17.0             | 11.9          |
| 16 | 0.20                       | 1000                                                          | 600                               | 28.1                  | 26.5               | 29.2             | 10.7          |
| 17 | 0.12                       | 1000                                                          | 350                               | 31.6                  | 37.7               | 20.9             | 14.4          |
| 18 | 0.20                       | 1000                                                          | 350                               | 34.7                  | 28.9               | 19.9             | 11.6          |
| 19 | 0.20                       | 1000                                                          | 650                               | 25.3                  | 34.7               | 32.2             | 11.5          |
| 20 | 0.20                       | 1000                                                          | 950                               | 18.6                  | 33.5               | 42.5             | 11.4          |
| 21 | 0.12                       | 1000                                                          | 400                               | 28.9                  | 41.5               | 23.7             | 15.0          |
| 22 | 0.12                       | 1000                                                          | 700                               | 20.0                  | 45.5               | 37.4             | 14.3          |
| 23 | 0.20                       | 1000                                                          | 400                               | 31.9                  | 32.5               | 22.8             | 12.1          |
| 24 | 0.20                       | 1000                                                          | 700                               | 23.3                  | 36.0               | 35.1             | 11.5          |
| 25 | 0.20                       | 1000                                                          | 1000                              | 16.8                  | 47.1               | 45.7             | 11.4          |
| 26 | 0.09                       | 1250                                                          | 300                               | 34.5                  | 40.2               | 14.5             | 17.3          |
| 27 | 0.16                       | 1250                                                          | 300                               | 38.1                  | 35.0               | 13.9             | 13.7          |
| 28 | 0.16                       | 1250                                                          | 600                               | 27.4                  | 36.5               | 26.5             | 14.3          |
| 29 | 0.12                       | 1500                                                          | 300                               | 39.8                  | 27.8               | 11.7             | 14.1          |
| 30 | 0.20                       | 1500                                                          | 300                               | 42.5                  | 20.8               | 11.2             | 11.6          |
| 31 | 0.20                       | 1500                                                          | 600                               | 31.6                  | 32.4               | 22.3             | 13.0          |
| 32 | 0.12                       | 1500                                                          | 350                               | 36.9                  | 33.8               | 13.8             | 15.2          |
| 33 | 0.20                       | 1500                                                          | 350                               | 38.7                  | 31.8               | 13.4             | 13.5          |
| 34 | 0.20                       | 1500                                                          | 650                               | 29.5                  | 33.5               | 24.4             | 13.6          |
| 35 | 0.20                       | 1500                                                          | 950                               | 23.0                  | 37.8               | 33.3             | 13.7          |
| 36 | 0.12                       | 1500                                                          | 400                               | 33.3                  | 44.2               | 16.0             | 17.2          |
| 37 | 0.20                       | 1500                                                          | 400                               | 34.6                  | 42.5               | 15.7             | 16.0          |
| 38 | 0.20                       | 1500                                                          | 700                               | 27.2                  | 40.0               | 26.4             | 14.6          |
| 39 | 0.20                       | 1500                                                          | 1000                              | 21.7                  | 42.3               | 35.2             | 13.7          |
| 40 | 0.09                       | 2000                                                          | 300                               | 41.2                  | 43.2               | 5.7              | 18.4          |
| 41 | 0.16                       | 2000                                                          | 300                               | 44.8                  | 31.9               | 5.3              | 15.1          |
| 42 | 0.12                       | 2000                                                          | 400                               | 38.3                  | 38.6               | 12.3             | 15.1          |
| 43 | 0.16                       | 2000                                                          | 400                               | 40.6                  | 26.6               | 11.7             | 13.2          |
| 44 | 0.16                       | 750                                                           | 400                               | 30.2                  | 28.5               | 26.4             | 10.7          |
| 45 | 0.20                       | 750                                                           | 700                               | 22.5                  | 36.2               | 38.8             | 9.0           |
| 46 | 0.20                       | 1250                                                          | 700                               | 27.4                  | 32.7               | 28.7             | 12.1          |
